# Supplementary material for: Ripening and recrystallization of NaCl nanocrystals in humid conditions
Source: Royal Society of Chemistry journal article supplement (doi:10.1039/c5ra22425j), 2015-12-21
Supplement: c5ra22425j2.pdf [file c5ra22425j2.pdf]

**Supporting information**

# Ripening and recrystallization of NaCl nanocrystals in humid conditions

*Manuel Oliva-Ramirez, Manuel Macías, Ana Borrás, Agustín R. González-Elipe\**

†Nanotechnology on Surfaces Laboratory. Instituto de Ciencia de Materiales de Sevilla  
(CSIC-Univ. Sevilla). 41092 Sevilla. Spain

**Figure S1.** Normal ESEM micrographs of NaCl nanoparticles deposited by e-beam evaporation at 60° after they exposure to a humid environment for increasing periods of time as indicated, once the onset for water condensation has been reached.

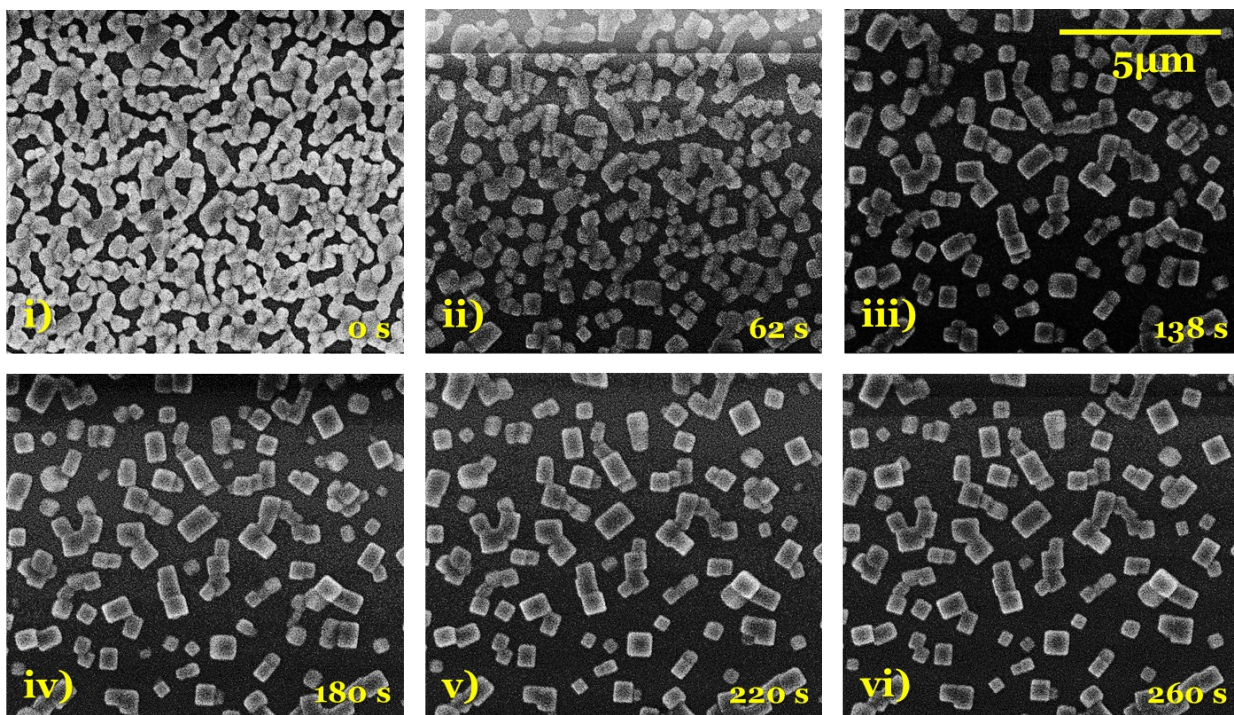

**Figure S2.** In situ XRD diagrams recorded for the 60° sample while exposed to saturated water pressure conditions at room temperature.

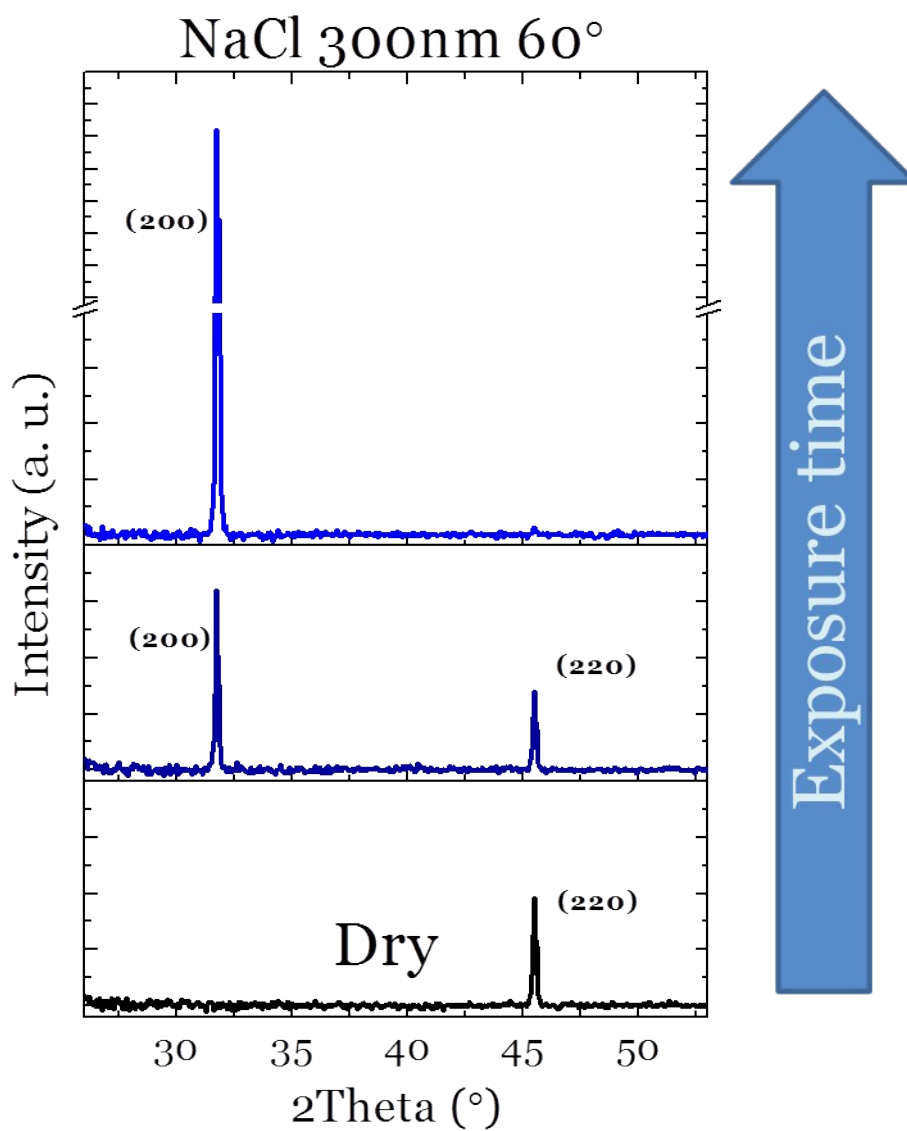

**Movie S3.** Set of cross section ESEM micrographs successively arranged to show the time evolution of nanoparticle regrowth in the 60° sample exposed to a saturated water vapor.
